# Supplementary material for: Cobalt complexes with hemilabileo-iminobenzoquinonate ligands: a novel example of redox-induced electron transfer
Source: Royal Society of Chemistry journal article supplement (doi:10.1039/c8dt02733a), 2018-01-01
Supplement: c8dt02733a4.pdf [file c8dt02733a4.pdf]

**Supporting Information**

**Cobalt complexes with hemilabile o-  
iminobenzoquinonate ligands: a novel example of  
redox-induced electron transfer**

*Alexandr V. Piskunov<sup>a\*</sup>, Kira I. Pashanova<sup>a</sup>, Artem S. Bogomyakov<sup>b</sup>, Ivan. V. Smolyaninov<sup>c</sup>,  
Andrey G. Starikov<sup>d</sup>, Georgy K. Fukin<sup>a</sup>*

<sup>a</sup>G.A. Razuvaev Institute of Organometallic Chemistry, Russian Academy of Sciences,  
Laboratory of Organoelement Compounds, 49 Tropinina Street, 603137, Nizhny Novgorod,  
Russian Federation. E-mail: pial@iomc.ras.ru

<sup>b</sup>International Tomography Center, Siberian Branch of the Russian Academy of Sciences, 3a  
Institutskaya str., 630090, Novosibirsk, Russian Federation

<sup>c</sup>Southern Scientific Centre of Russian Academy of Sciences, Toxicology Research Group,  
Tatischeva str. 16, 414025, Astrakhan, Russian Federation

<sup>d</sup>Institute of Physical and Organic Chemistry, Southern Federal University 344090, Stachka  
Avenue 194/2, Rostov-on-Don, Russian Federation. E-mail: andr@ipoc.sfedu.ru

## Table of Contents

|                                                                                                                                                                                                                                                                                                                                                                                                                                                                                                                                                                                                                                                                                                |   |
|------------------------------------------------------------------------------------------------------------------------------------------------------------------------------------------------------------------------------------------------------------------------------------------------------------------------------------------------------------------------------------------------------------------------------------------------------------------------------------------------------------------------------------------------------------------------------------------------------------------------------------------------------------------------------------------------|---|
| <b>Table of Contents</b> .....                                                                                                                                                                                                                                                                                                                                                                                                                                                                                                                                                                                                                                                                 | 2 |
| <b>Figure S1.</b> Fragment of unit cell of complex 1. Hydrogen atoms and <i>tert</i> -butyl groups are omitted for clarity. ....                                                                                                                                                                                                                                                                                                                                                                                                                                                                                                                                                               | 3 |
| <b>Table S1.</b> X-Ray crystallographic data and structure refinement for 1 and 2.....                                                                                                                                                                                                                                                                                                                                                                                                                                                                                                                                                                                                         | 3 |
| <b>Figure S2.</b> The data of NIR-spectroscopy for complex 1 in Nijol.....                                                                                                                                                                                                                                                                                                                                                                                                                                                                                                                                                                                                                     | 4 |
| <b>Table S2.</b> Spin states (S), total energies without ( $E_{\text{total}}$ ) and with ( $E_{\text{total}}^{\text{ZPE}}$ ) taking into account for energies of zero-point harmonic vibrations (given in a.u.), relative energies without ( $\Delta E$ ) and with ( $\Delta E^{\text{ZPE}}$ ) taking into account for energies of zero-point harmonic vibrations (given in kcal/mol), spin density at the metal center ( $q_s^{\text{Co}}$ , given in a.u.), expectation values of the spin-squared operator (S2) and exchange spin coupling constants (J, given in $\text{cm}^{-1}$ ) of the isomeric forms of the complexes 1 and 2 calculated by the DFT B3LYP*/6-311++G(d,p) method. .... | 5 |
| <b>Table S3.</b> Calculated atomic coordinates of the isomeric forms of the complexes 1 and 2 (DFT B3LYP*/6-311++G(d,p)). ....                                                                                                                                                                                                                                                                                                                                                                                                                                                                                                                                                                 | 6 |

**Figure S1.** Fragment of unit cell of complex **1**. Hydrogen atoms and *tert*-butyl groups are omitted for clarity.

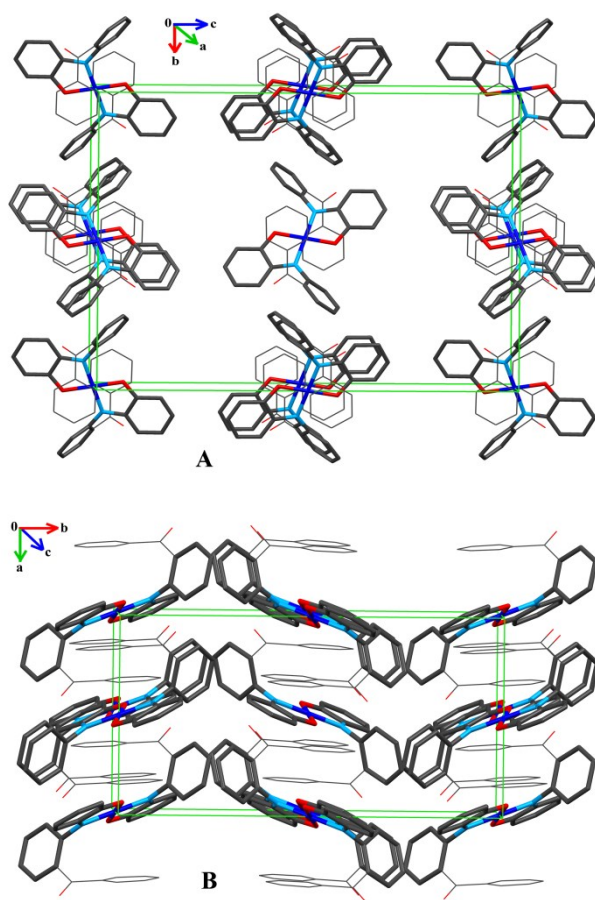

**Table S1.** X-Ray crystallographic data and structure refinement for **1** and **2**.

|                                                 | C <sub>54</sub> H <sub>58</sub> CoN <sub>2</sub> O <sub>4</sub> | C <sub>69</sub> H <sub>74</sub> CoF <sub>3</sub> N <sub>2</sub> O <sub>7</sub> S |
|-------------------------------------------------|-----------------------------------------------------------------|----------------------------------------------------------------------------------|
| Formula weight                                  | 857.95                                                          | 1191.29                                                                          |
| Crystal system                                  | Orthorhombic                                                    | Monoclinic                                                                       |
| Space group                                     | Pbca                                                            | P2(1)/c                                                                          |
| Unit cell dimensions                            |                                                                 |                                                                                  |
| a (Å)                                           | 9.8173(5)                                                       | 15.8911(4)                                                                       |
| b (Å)                                           | 18.7393(10)                                                     | 10.2319(3)                                                                       |
| c (Å)                                           | 24.5585(13)                                                     | 38.2603(17)                                                                      |
| α (deg)                                         | 90                                                              | 90                                                                               |
| β (deg)                                         | 90                                                              | 98.395(3)                                                                        |
| γ (deg)                                         | 90                                                              | 90                                                                               |
| V (Å <sup>3</sup> )                             | 4518.0(4)                                                       | 6154.3(4)                                                                        |
| Z                                               | 4                                                               | 4                                                                                |
| ρ <sub>calcd</sub> (g/cm <sup>3</sup> )         | 1.261                                                           | 1.286                                                                            |
| Absorption coefficient (mm <sup>-1</sup> )      | 0.428                                                           | 0.377                                                                            |
| F(000)                                          | 1820                                                            | 2512                                                                             |
| Crystal size (mm <sup>3</sup> )                 | 0.380 x 0.200 x 0.090                                           | 0.430 x 0.150 x 0.120                                                            |
| Θ range for data collection (deg)               | 2.326 - 30.000                                                  | 2.977 - 25.000                                                                   |
| Reflections collected                           | 60621                                                           | 44241                                                                            |
| Indep reflections                               | 6590 [R <sub>int</sub> = 0.0296]                                | 10800 [R <sub>int</sub> = 0.1152]                                                |
| Completeness to Θ max                           | 99.9 %                                                          | 99.6 %                                                                           |
| Data/ restraints/parameters                     | 6590 / 0 / 283                                                  | 10800 / 385 / 875                                                                |
| Final R indices [I>2σ(I)]                       | R1 = 0.0361<br>wR2 = 0.0934                                     | R1 = 0.0847<br>wR2 = 0.1813                                                      |
| R indices (all data)                            | R1 = 0.0420<br>wR2 = 0.0964                                     | R1 = 0.1395<br>wR2 = 0.2100                                                      |
| GOF on F <sup>2</sup>                           | 1.038                                                           | 1.063                                                                            |
| Largest diff. peak and hole (e/Å <sup>3</sup> ) | 0.546/-0.209                                                    | 0.861/ -0.529                                                                    |

**Figure S2.** The data of NIR-spectroscopy for complex **1** in Nijol.

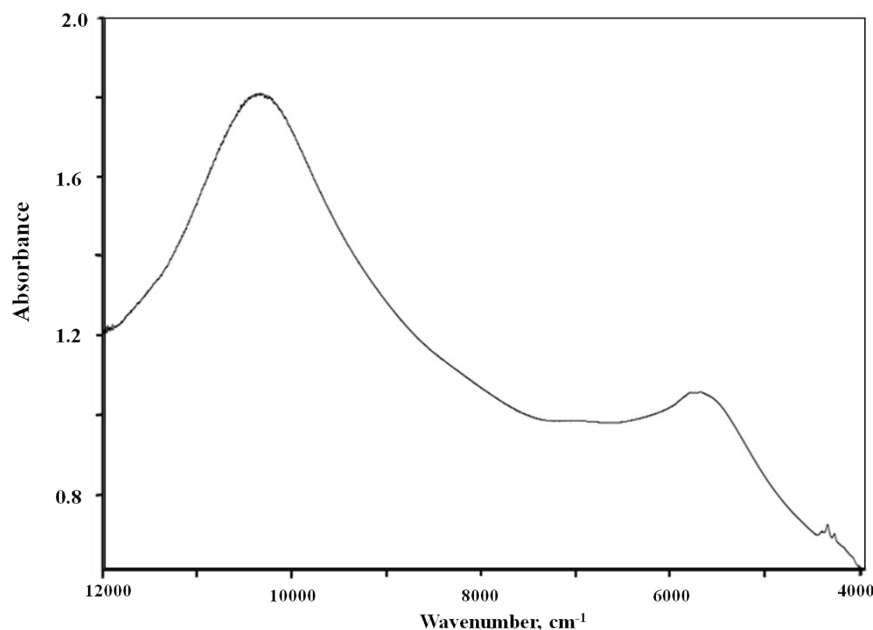

**Table S2.** Spin states (S), total energies without ( $E_{\text{total}}$ ) and with ( $E_{\text{total}}^{\text{ZPE}}$ ) taking into account for energies of zero-point harmonic vibrations (given in a.u.), relative energies without ( $\Delta E$ ) and with ( $\Delta E^{\text{ZPE}}$ ) taking into account for energies of zero-point harmonic vibrations (given in kcal/mol), spin density at the metal center ( $q_s^{\text{Co}}$ , given in a.u.), expectation values of the spin-squared operator ( $S^2$ ) and exchange spin coupling constants (J, given in  $\text{cm}^{-1}$ ) of the isomeric forms of the complexes **1** and **2** calculated by the DFT B3LYP\*/6-311++G(d,p) method.

| Structure              | S   | $E_{\text{total}}$ | $E_{\text{total}}^{\text{ZPE}}$ | $\Delta E$ | $\Delta E^{\text{ZPE}}$ | $q_s^{\text{Co}}$ | $S^2$ | $J_{\text{Co-ISQ}}$ | $J_{\text{ISQ-ISQ}}$ |
|------------------------|-----|--------------------|---------------------------------|------------|-------------------------|-------------------|-------|---------------------|----------------------|
| <b>1a</b>              | 3/2 | -3866.398281       | -3865.445145                    | 0.0        | 0.0                     | 1.21              | 3.771 | -307                | –                    |
| BS $\beta\alpha^*$     | 1/2 | -3866.406091       |                                 |            |                         |                   | 0.977 |                     |                      |
| <b>1b</b>              | 5/2 | -3866.388936       | -3865.436799                    | 5.9        | 5.2                     | 2.62              | 8.772 | -260                | 17                   |
| BS $\beta\alpha\alpha$ | 3/2 | -3866.396420       |                                 |            |                         |                   | 4.570 |                     |                      |
| BS $\alpha\beta\alpha$ | 1/2 | -3866.404207       |                                 |            |                         |                   | 2.330 |                     |                      |
| <b>1c</b>              | 5/2 | -3866.387485       | -3865.435858                    | 6.8        | 5.8                     | 2.52              | 8.768 | –                   | –                    |
| <b>2a</b>              | 4/2 | -3866.220359       | -3865.263792                    | 0.0        | 0.0                     | 2.58              | 6.014 | -295                | –                    |
| BS $\beta\alpha$       | 2/2 | -3866.228807       |                                 |            |                         |                   | 2.870 |                     |                      |
| <b>2b</b>              | 4/2 | -3866.210090       | -3865.254864                    | 6.4        | 5.6                     | 1.73              | 6.036 | -508                | -345                 |
| BS $\beta\alpha\alpha$ | 2/2 | -3866.224916       |                                 |            |                         |                   | 2.056 |                     |                      |
| BS $\alpha\beta\alpha$ | 0   | -3866.225401       |                                 |            |                         |                   | 1.172 |                     |                      |

\* $\alpha$  corresponds to the spin-up orientation,  $\beta$  corresponds to the spin-down orientation

**Table S3.** Calculated atomic coordinates of the isomeric forms of the complexes **1** and **2** (DFT B3LYP\*/6-311++G(d,p)).

| <b>1a Cat-<sub>IS</sub>Co<sup>III</sup>-ISQ</b> |              |              |              |
|-------------------------------------------------|--------------|--------------|--------------|
| 27                                              | -0.000014000 | 0.000021000  | -0.000012000 |
| 8                                               | -1.124252000 | 1.494521000  | 0.276146000  |
| 7                                               | -1.636253000 | -0.917484000 | -0.426705000 |
| 6                                               | -2.415629000 | 1.267439000  | 0.008514000  |
| 8                                               | -4.334425000 | -3.136049000 | 1.588091000  |
| 6                                               | -2.742143000 | -0.089339000 | -0.404064000 |
| 6                                               | -4.077176000 | -0.439244000 | -0.762875000 |
| 1                                               | -4.289477000 | -1.465683000 | -1.083048000 |
| 6                                               | -5.093606000 | 0.522111000  | -0.702403000 |
| 6                                               | -4.749866000 | 1.844745000  | -0.261290000 |
| 1                                               | -5.552140000 | 2.585136000  | -0.206644000 |
| 6                                               | -3.450528000 | 2.257357000  | 0.102699000  |
| 6                                               | -6.556267000 | 0.128170000  | -1.079062000 |
| 6                                               | -7.520567000 | 1.354441000  | -1.108147000 |
| 1                                               | -7.617218000 | 1.833524000  | -0.112913000 |
| 1                                               | -8.533025000 | 1.018148000  | -1.410259000 |
| 1                                               | -7.191793000 | 2.124025000  | -1.836390000 |
| 6                                               | -6.580606000 | -0.531964000 | -2.499700000 |
| 1                                               | -7.620446000 | -0.806175000 | -2.773861000 |
| 1                                               | -5.970369000 | -1.454946000 | -2.540526000 |
| 1                                               | -6.194115000 | 0.167454000  | -3.269067000 |
| 6                                               | -7.094954000 | -0.896157000 | -0.021847000 |
| 1                                               | -7.116986000 | -0.441992000 | 0.989857000  |
| 1                                               | -6.463546000 | -1.803937000 | 0.034098000  |
| 1                                               | -8.128740000 | -1.207446000 | -0.281469000 |
| 6                                               | -3.156001000 | 3.704179000  | 0.604194000  |
| 6                                               | -4.428566000 | 4.607097000  | 0.584398000  |
| 1                                               | -5.229685000 | 4.218530000  | 1.245672000  |
| 1                                               | -4.842917000 | 4.722648000  | -0.438155000 |
| 1                                               | -4.159164000 | 5.618485000  | 0.950323000  |
| 6                                               | -2.077977000 | 4.387585000  | -0.303815000 |
| 1                                               | -2.422600000 | 4.430648000  | -1.357823000 |
| 1                                               | -1.119284000 | 3.842239000  | -0.265772000 |
| 1                                               | -1.898727000 | 5.428003000  | 0.038766000  |
| 6                                               | -2.640506000 | 3.637394000  | 2.082584000  |
| 1                                               | -3.414282000 | 3.199119000  | 2.745964000  |
| 1                                               | -2.409261000 | 4.658701000  | 2.451889000  |
| 1                                               | -1.725058000 | 3.024421000  | 2.158546000  |
| 6                                               | -1.789018000 | -2.309068000 | -0.755253000 |
| 6                                               | -2.480874000 | -3.223967000 | 0.093985000  |
| 6                                               | -2.643901000 | -4.567347000 | -0.331380000 |
| 1                                               | -3.204507000 | -5.255594000 | 0.316067000  |
| 6                                               | -2.103503000 | -5.017013000 | -1.548950000 |
| 1                                               | -2.229254000 | -6.065703000 | -1.852513000 |
| 6                                               | -1.406457000 | -4.111520000 | -2.377300000 |
| 1                                               | -0.985204000 | -4.448015000 | -3.335218000 |

|   |              |              |              |
|---|--------------|--------------|--------------|
| 6 | -1.254955000 | -2.770391000 | -1.983303000 |
| 1 | -0.730742000 | -2.051712000 | -2.626834000 |
| 6 | -3.145652000 | -2.843378000 | 1.417733000  |
| 6 | -2.346106000 | -2.192756000 | 2.525232000  |
| 6 | -0.931675000 | -2.261339000 | 2.573007000  |
| 1 | -0.376752000 | -2.755469000 | 1.765586000  |
| 6 | -0.231165000 | -1.711399000 | 3.666440000  |
| 1 | 0.865203000  | -1.780036000 | 3.701895000  |
| 6 | -0.936181000 | -1.075495000 | 4.709335000  |
| 1 | -0.388645000 | -0.643393000 | 5.559525000  |
| 6 | -2.347124000 | -0.997464000 | 4.664291000  |
| 1 | -2.896834000 | -0.501211000 | 5.476779000  |
| 6 | -3.048808000 | -1.561460000 | 3.584522000  |
| 1 | -4.145512000 | -1.527203000 | 3.541939000  |
| 8 | 1.124236000  | -1.494473000 | -0.276213000 |
| 7 | 1.636240000  | 0.917522000  | 0.426697000  |
| 6 | 2.415599000  | -1.267396000 | -0.008571000 |
| 8 | 4.334435000  | 3.136219000  | -1.588016000 |
| 6 | 2.742124000  | 0.089378000  | 0.404029000  |
| 6 | 4.077168000  | 0.439262000  | 0.762839000  |
| 1 | 4.289480000  | 1.465689000  | 1.083038000  |
| 6 | 5.093587000  | -0.522101000 | 0.702343000  |
| 6 | 4.749829000  | -1.844734000 | 0.261227000  |
| 1 | 5.552096000  | -2.585133000 | 0.206590000  |
| 6 | 3.450489000  | -2.257328000 | -0.102756000 |
| 6 | 6.556258000  | -0.128191000 | 1.078991000  |
| 6 | 7.520482000  | -1.354518000 | 1.108270000  |
| 1 | 7.617128000  | -1.833747000 | 0.113107000  |
| 1 | 8.532953000  | -1.018244000 | 1.410359000  |
| 1 | 7.191642000  | -2.123978000 | 1.836614000  |
| 6 | 6.580605000  | 0.532138000  | 2.499538000  |
| 1 | 7.620455000  | 0.806329000  | 2.773679000  |
| 1 | 5.970422000  | 1.455161000  | 2.540225000  |
| 1 | 6.194062000  | -0.167151000 | 3.268996000  |
| 6 | 7.095027000  | 0.895958000  | 0.021643000  |
| 1 | 7.117042000  | 0.441654000  | -0.989998000 |
| 1 | 6.463679000  | 1.803771000  | -0.034431000 |
| 1 | 8.128831000  | 1.207213000  | 0.281235000  |
| 6 | 3.155911000  | -3.704145000 | -0.604228000 |
| 6 | 4.428440000  | -4.607114000 | -0.584444000 |
| 1 | 5.229567000  | -4.218577000 | -1.245725000 |
| 1 | 4.842795000  | -4.722682000 | 0.438106000  |
| 1 | 4.158995000  | -5.618490000 | -0.950368000 |
| 6 | 2.077876000  | -4.387492000 | 0.303812000  |
| 1 | 2.422522000  | -4.430562000 | 1.357813000  |
| 1 | 1.119207000  | -3.842099000 | 0.265788000  |
| 1 | 1.898564000  | -5.427904000 | -0.038754000 |
| 6 | 2.640384000  | -3.637358000 | -2.082605000 |
| 1 | 3.414155000  | -3.199110000 | -2.746008000 |
| 1 | 2.409101000  | -4.658661000 | -2.451898000 |
| 1 | 1.724950000  | -3.024360000 | -2.158550000 |
| 6 | 1.788998000  | 2.309100000  | 0.755276000  |

|   |              |             |              |
|---|--------------|-------------|--------------|
| 6 | 2.480858000  | 3.224022000 | -0.093934000 |
| 6 | 2.643858000  | 4.567396000 | 0.331455000  |
| 1 | 3.204472000  | 5.255658000 | -0.315970000 |
| 6 | 2.103435000  | 5.017036000 | 1.549023000  |
| 1 | 2.229172000  | 6.065722000 | 1.852606000  |
| 6 | 1.406384000  | 4.111522000 | 2.377345000  |
| 1 | 0.985106000  | 4.447994000 | 3.335260000  |
| 6 | 1.254903000  | 2.770397000 | 1.983321000  |
| 1 | 0.730678000  | 2.051704000 | 2.626828000  |
| 6 | 3.145682000  | 2.843458000 | -1.417668000 |
| 6 | 2.346213000  | 2.192730000 | -2.525159000 |
| 6 | 0.931773000  | 2.261145000 | -2.572934000 |
| 1 | 0.376790000  | 2.755208000 | -1.765513000 |
| 6 | 0.231326000  | 1.711110000 | -3.666360000 |
| 1 | -0.865050000 | 1.779617000 | -3.701814000 |
| 6 | 0.936417000  | 1.075279000 | -4.709249000 |
| 1 | 0.388934000  | 0.643103000 | -5.559434000 |
| 6 | 2.347369000  | 0.997412000 | -4.664203000 |
| 1 | 2.897135000  | 0.501210000 | -5.476684000 |
| 6 | 3.048988000  | 1.561502000 | -3.584441000 |
| 1 | 4.145696000  | 1.527374000 | -3.541860000 |

**1b ISQ<sub>-HS</sub>Co<sup>II</sup>-ISQ**

|    |              |              |              |
|----|--------------|--------------|--------------|
| 27 | -0.526302000 | 0.342285000  | -0.505971000 |
| 8  | -2.012912000 | 1.679041000  | -0.352558000 |
| 7  | -2.101843000 | -1.000790000 | -0.488439000 |
| 6  | -3.201959000 | 1.125116000  | -0.261921000 |
| 8  | -1.458524000 | -2.207894000 | 2.083733000  |
| 6  | -3.293878000 | -0.355516000 | -0.344450000 |
| 6  | -4.573750000 | -0.995643000 | -0.233008000 |
| 1  | -4.604475000 | -2.091695000 | -0.254307000 |
| 6  | -5.737667000 | -0.250955000 | -0.059417000 |
| 6  | -5.624496000 | 1.187868000  | -0.006780000 |
| 1  | -6.545402000 | 1.762719000  | 0.122414000  |
| 6  | -4.417376000 | 1.895465000  | -0.097892000 |
| 6  | -7.110372000 | -0.977820000 | 0.099050000  |
| 6  | -8.306493000 | 0.013829000  | 0.240153000  |
| 1  | -8.213448000 | 0.652915000  | 1.141468000  |
| 1  | -9.250197000 | -0.560162000 | 0.337301000  |
| 1  | -8.407279000 | 0.672542000  | -0.646433000 |
| 6  | -7.375564000 | -1.876649000 | -1.156722000 |
| 1  | -8.348549000 | -2.401154000 | -1.054674000 |
| 1  | -6.589247000 | -2.645804000 | -1.286482000 |
| 1  | -7.409317000 | -1.264697000 | -2.081190000 |
| 6  | -7.072615000 | -1.878434000 | 1.381298000  |
| 1  | -6.888385000 | -1.267439000 | 2.288148000  |
| 1  | -6.273722000 | -2.643230000 | 1.322095000  |
| 1  | -8.041481000 | -2.405075000 | 1.509912000  |
| 6  | -4.365535000 | 3.453034000  | -0.027361000 |
| 6  | -5.781702000 | 4.083378000  | 0.152743000  |
| 1  | -6.266526000 | 3.759695000  | 1.096527000  |
| 1  | -6.459179000 | 3.840523000  | -0.691492000 |



|   |              |              |              |
|---|--------------|--------------|--------------|
| 1 | -5.683589000 | 5.187089000  | 0.192251000  |
| 6 | -3.762796000 | 4.020445000  | -1.358780000 |
| 1 | -4.403275000 | 3.750470000  | -2.223902000 |
| 1 | -2.748245000 | 3.623277000  | -1.539119000 |
| 1 | -3.706531000 | 5.128225000  | -1.308222000 |
| 6 | -3.490330000 | 3.903857000  | 1.192577000  |
| 1 | -3.925991000 | 3.533630000  | 2.143445000  |
| 1 | -3.453422000 | 5.012369000  | 1.242801000  |
| 1 | -2.457649000 | 3.521810000  | 1.112328000  |
| 6 | -2.045239000 | -2.381418000 | -0.835012000 |
| 6 | -1.331983000 | -3.329166000 | -0.032008000 |
| 6 | -1.228021000 | -4.672455000 | -0.479273000 |
| 1 | -0.700779000 | -5.402482000 | 0.149572000  |
| 6 | -1.815026000 | -5.092698000 | -1.686351000 |
| 1 | -1.732889000 | -6.141122000 | -2.004219000 |
| 6 | -2.502396000 | -4.152880000 | -2.483748000 |
| 1 | -2.948545000 | -4.459406000 | -3.440795000 |
| 6 | -2.611253000 | -2.815508000 | -2.064323000 |
| 1 | -3.122270000 | -2.076130000 | -2.695957000 |
| 6 | -0.808692000 | -2.957089000 | 1.343686000  |
| 6 | 0.508704000  | -3.543755000 | 1.819532000  |
| 6 | 1.555652000  | -3.886577000 | 0.926558000  |
| 1 | 1.421123000  | -3.753102000 | -0.155020000 |
| 6 | 2.782692000  | -4.371111000 | 1.423618000  |
| 1 | 3.594542000  | -4.618429000 | 0.725346000  |
| 6 | 2.968605000  | -4.534141000 | 2.812064000  |
| 1 | 3.922505000  | -4.921946000 | 3.197556000  |
| 6 | 1.930689000  | -4.193004000 | 3.708400000  |
| 1 | 2.075447000  | -4.317454000 | 4.790976000  |
| 6 | 0.713421000  | -3.689763000 | 3.216358000  |
| 1 | -0.097079000 | -3.404673000 | 3.900516000  |
| 8 | 0.862051000  | -0.196130000 | -1.850829000 |
| 7 | 1.123170000  | 0.636052000  | 0.679070000  |
| 6 | 2.076975000  | -0.216218000 | -1.350428000 |
| 8 | 4.006230000  | 3.400110000  | 1.713881000  |
| 6 | 2.266322000  | 0.223306000  | 0.053707000  |
| 6 | 3.569615000  | 0.152110000  | 0.654781000  |
| 1 | 3.670422000  | 0.433642000  | 1.707392000  |
| 6 | 4.668568000  | -0.278696000 | -0.079919000 |
| 6 | 4.466930000  | -0.653361000 | -1.464266000 |
| 1 | 5.348997000  | -0.974983000 | -2.029025000 |
| 6 | 3.230974000  | -0.643946000 | -2.118704000 |
| 6 | 6.100175000  | -0.369513000 | 0.523973000  |
| 6 | 6.626143000  | -1.841751000 | 0.414252000  |
| 1 | 6.676790000  | -2.191107000 | -0.636151000 |
| 1 | 7.647700000  | -1.914454000 | 0.842276000  |
| 1 | 5.967478000  | -2.536362000 | 0.974381000  |
| 6 | 6.135491000  | 0.050638000  | 2.025077000  |
| 1 | 7.174998000  | -0.024228000 | 2.404508000  |
| 1 | 5.797779000  | 1.096017000  | 2.169704000  |
| 1 | 5.503489000  | -0.611621000 | 2.651312000  |
| 6 | 7.057840000  | 0.584689000  | -0.270297000 |

|   |              |              |              |
|---|--------------|--------------|--------------|
| 1 | 7.111756000  | 0.321280000  | -1.345357000 |
| 1 | 6.717290000  | 1.636461000  | -0.190701000 |
| 1 | 8.085808000  | 0.523099000  | 0.143994000  |
| 6 | 3.072351000  | -1.072005000 | -3.610511000 |
| 6 | 4.436577000  | -1.472025000 | -4.253694000 |
| 1 | 5.162237000  | -0.632968000 | -4.249894000 |
| 1 | 4.901989000  | -2.340603000 | -3.743793000 |
| 1 | 4.267830000  | -1.760132000 | -5.311009000 |
| 6 | 2.118038000  | -2.311808000 | -3.712413000 |
| 1 | 2.536718000  | -3.174596000 | -3.153114000 |
| 1 | 1.115387000  | -2.082798000 | -3.310084000 |
| 1 | 2.008573000  | -2.617765000 | -4.774207000 |
| 6 | 2.485078000  | 0.117816000  | -4.446050000 |
| 1 | 3.161692000  | 0.996089000  | -4.404200000 |
| 1 | 2.381581000  | -0.183953000 | -5.509662000 |
| 1 | 1.492606000  | 0.422733000  | -4.070060000 |
| 6 | 1.112369000  | 1.274473000  | 1.953322000  |
| 6 | 1.904084000  | 2.424336000  | 2.282638000  |
| 6 | 1.825939000  | 2.959470000  | 3.594070000  |
| 1 | 2.459017000  | 3.823523000  | 3.838611000  |
| 6 | 0.951798000  | 2.424284000  | 4.556388000  |
| 1 | 0.897353000  | 2.869840000  | 5.559445000  |
| 6 | 0.143673000  | 1.317660000  | 4.216499000  |
| 1 | -0.547273000 | 0.886341000  | 4.954900000  |
| 6 | 0.224779000  | 0.749629000  | 2.934129000  |
| 1 | -0.380813000 | -0.131977000 | 2.681717000  |
| 6 | 2.856120000  | 3.149440000  | 1.333382000  |
| 6 | 2.371442000  | 3.643642000  | -0.013755000 |
| 6 | 0.995475000  | 3.804079000  | -0.312718000 |
| 1 | 0.232845000  | 3.528985000  | 0.427652000  |
| 6 | 0.597330000  | 4.338401000  | -1.555191000 |
| 1 | -0.471241000 | 4.466901000  | -1.774340000 |
| 6 | 1.567156000  | 4.704240000  | -2.511543000 |
| 1 | 1.253932000  | 5.114054000  | -3.482651000 |
| 6 | 2.941011000  | 4.545481000  | -2.220853000 |
| 1 | 3.697814000  | 4.830410000  | -2.965699000 |
| 6 | 3.340731000  | 4.026587000  | -0.976977000 |
| 1 | 4.403578000  | 3.911155000  | -0.727124000 |

**1c** ISQ<sub>-HS</sub>Co<sup>II</sup>-ISQ

|    |              |              |              |
|----|--------------|--------------|--------------|
| 27 | -0.000039000 | -0.000014000 | -0.000031000 |
| 8  | 1.271982000  | 1.543257000  | -0.198809000 |
| 7  | 1.784056000  | -0.952748000 | 0.445588000  |
| 6  | 2.536664000  | 1.276022000  | 0.046558000  |
| 8  | 4.367507000  | -3.101822000 | -1.825902000 |
| 6  | 2.866072000  | -0.116774000 | 0.415474000  |
| 6  | 4.217015000  | -0.473280000 | 0.728056000  |
| 1  | 4.432158000  | -1.510831000 | 1.009616000  |
| 6  | 5.235803000  | 0.479807000  | 0.677170000  |
| 6  | 4.892948000  | 1.825751000  | 0.290729000  |
| 1  | 5.702054000  | 2.559409000  | 0.245203000  |
| 6  | 3.595399000  | 2.258329000  | -0.026486000 |

|   |              |              |              |
|---|--------------|--------------|--------------|
| 6 | 6.704976000  | 0.065065000  | 1.003733000  |
| 6 | 7.677114000  | 1.284410000  | 1.060093000  |
| 1 | 7.755740000  | 1.802203000  | 0.082859000  |
| 1 | 8.693631000  | 0.930863000  | 1.326711000  |
| 1 | 7.369013000  | 2.026299000  | 1.825174000  |
| 6 | 6.759444000  | -0.652894000 | 2.395210000  |
| 1 | 7.804221000  | -0.941960000 | 2.632846000  |
| 1 | 6.145874000  | -1.574292000 | 2.413040000  |
| 1 | 6.394939000  | 0.016012000  | 3.201533000  |
| 6 | 7.212924000  | -0.917600000 | -0.107072000 |
| 1 | 7.209612000  | -0.424432000 | -1.100563000 |
| 1 | 6.577741000  | -1.821447000 | -0.181027000 |
| 1 | 8.252297000  | -1.240610000 | 0.112781000  |
| 6 | 3.296158000  | 3.728631000  | -0.452962000 |
| 6 | 4.582188000  | 4.612471000  | -0.463070000 |
| 1 | 5.342343000  | 4.237824000  | -1.178758000 |
| 1 | 5.049797000  | 4.682588000  | 0.540450000  |
| 1 | 4.311233000  | 5.641206000  | -0.775521000 |
| 6 | 2.279990000  | 4.383947000  | 0.543886000  |
| 1 | 2.686919000  | 4.384652000  | 1.576327000  |
| 1 | 1.316506000  | 3.845330000  | 0.542489000  |
| 1 | 2.088798000  | 5.437725000  | 0.251982000  |
| 6 | 2.698000000  | 3.742211000  | -1.901875000 |
| 1 | 3.418069000  | 3.307854000  | -2.625810000 |
| 1 | 2.486395000  | 4.786650000  | -2.213796000 |
| 1 | 1.757177000  | 3.166118000  | -1.951502000 |
| 6 | 1.951906000  | -2.352436000 | 0.701425000  |
| 6 | 2.609687000  | -3.228937000 | -0.215787000 |
| 6 | 2.771073000  | -4.595406000 | 0.128786000  |
| 1 | 3.304548000  | -5.250471000 | -0.573807000 |
| 6 | 2.256133000  | -5.109460000 | 1.331767000  |
| 1 | 2.377893000  | -6.174638000 | 1.572690000  |
| 6 | 1.582501000  | -4.246446000 | 2.223017000  |
| 1 | 1.175266000  | -4.634197000 | 3.167681000  |
| 6 | 1.435575000  | -2.883312000 | 1.910635000  |
| 1 | 0.928553000  | -2.201418000 | 2.606729000  |
| 6 | 3.206467000  | -2.783026000 | -1.547525000 |
| 6 | 2.357101000  | -2.026314000 | -2.550008000 |
| 6 | 0.940170000  | -2.074686000 | -2.523450000 |
| 1 | 0.422946000  | -2.643395000 | -1.739534000 |
| 6 | 0.188149000  | -1.419045000 | -3.520917000 |
| 1 | -0.909325000 | -1.476666000 | -3.502814000 |
| 6 | 0.844817000  | -0.699227000 | -4.541940000 |
| 1 | 0.258047000  | -0.186242000 | -5.317634000 |
| 6 | 2.256339000  | -0.645194000 | -4.571657000 |
| 1 | 2.768548000  | -0.085728000 | -5.367373000 |
| 6 | 3.008481000  | -1.313092000 | -3.587887000 |
| 1 | 4.106316000  | -1.296770000 | -3.606890000 |
| 8 | -1.272075000 | -1.543265000 | 0.198738000  |
| 7 | -1.784131000 | 0.952755000  | -0.445615000 |
| 6 | -2.536760000 | -1.276012000 | -0.046596000 |
| 8 | -4.367271000 | 3.101952000  | 1.826210000  |

|   |              |              |              |
|---|--------------|--------------|--------------|
| 6 | -2.866158000 | 0.116796000  | -0.415483000 |
| 6 | -4.217103000 | 0.473325000  | -0.728027000 |
| 1 | -4.432239000 | 1.510885000  | -1.009559000 |
| 6 | -5.235905000 | -0.479748000 | -0.677130000 |
| 6 | -4.893059000 | -1.825702000 | -0.290717000 |
| 1 | -5.702173000 | -2.559351000 | -0.245175000 |
| 6 | -3.595509000 | -2.258303000 | 0.026458000  |
| 6 | -6.705086000 | -0.064976000 | -1.003619000 |
| 6 | -7.677231000 | -1.284314000 | -1.060027000 |
| 1 | -7.755847000 | -1.802159000 | -0.082820000 |
| 1 | -8.693751000 | -0.930748000 | -1.326610000 |
| 1 | -7.369145000 | -2.026164000 | -1.825152000 |
| 6 | -6.759606000 | 0.653078000  | -2.395045000 |
| 1 | -7.804392000 | 0.942167000  | -2.632614000 |
| 1 | -6.146034000 | 1.574475000  | -2.412838000 |
| 1 | -6.395141000 | -0.015776000 | -3.201430000 |
| 6 | -7.212984000 | 0.917619000  | 0.107271000  |
| 1 | -7.209643000 | 0.424384000  | 1.100729000  |
| 1 | -6.577785000 | 1.821452000  | 0.181260000  |
| 1 | -8.252360000 | 1.240657000  | -0.112524000 |
| 6 | -3.296296000 | -3.728616000 | 0.452908000  |
| 6 | -4.582345000 | -4.612427000 | 0.462944000  |
| 1 | -5.342529000 | -4.237763000 | 1.178592000  |
| 1 | -5.049902000 | -4.682526000 | -0.540602000 |
| 1 | -4.311431000 | -5.641169000 | 0.775405000  |
| 6 | -2.280107000 | -4.383926000 | -0.543922000 |
| 1 | -2.687002000 | -4.384599000 | -1.576378000 |
| 1 | -1.316615000 | -3.845326000 | -0.542480000 |
| 1 | -2.088942000 | -5.437714000 | -0.252039000 |
| 6 | -2.698195000 | -3.742244000 | 1.901846000  |
| 1 | -3.418278000 | -3.307878000 | 2.625762000  |
| 1 | -2.486637000 | -4.786697000 | 2.213755000  |
| 1 | -1.757354000 | -3.166186000 | 1.951520000  |
| 6 | -1.951973000 | 2.352450000  | -0.701422000 |
| 6 | -2.609660000 | 3.228950000  | 0.215857000  |
| 6 | -2.771028000 | 4.595433000  | -0.128671000 |
| 1 | -3.304425000 | 5.250499000  | 0.573981000  |
| 6 | -2.256169000 | 5.109496000  | -1.331682000 |
| 1 | -2.377916000 | 6.174683000  | -1.572573000 |
| 6 | -1.582627000 | 4.246482000  | -2.223000000 |
| 1 | -1.175450000 | 4.634242000  | -3.167685000 |
| 6 | -1.435712000 | 2.883337000  | -1.910657000 |
| 1 | -0.928755000 | 2.201445000  | -2.606799000 |
| 6 | -3.206312000 | 2.783026000  | 1.547645000  |
| 6 | -2.356861000 | 2.026230000  | 2.549992000  |
| 6 | -0.939928000 | 2.074428000  | 2.523176000  |
| 1 | -0.422777000 | 2.643054000  | 1.739150000  |
| 6 | -0.187807000 | 1.418713000  | 3.520518000  |
| 1 | 0.909671000  | 1.476197000  | 3.502213000  |
| 6 | -0.844378000 | 0.698994000  | 4.541672000  |
| 1 | -0.257530000 | 0.185952000  | 5.317270000  |
| 6 | -2.255902000 | 0.645130000  | 4.571644000  |

|   |              |             |             |
|---|--------------|-------------|-------------|
| 1 | -2.768034000 | 0.085737000 | 5.367461000 |
| 6 | -3.008141000 | 1.313101000 | 3.587998000 |
| 1 | -4.105974000 | 1.296909000 | 3.607197000 |

**2a** IQ<sub>-HS</sub>Co<sup>II</sup>-ISQ<sup>+</sup>

|    |              |              |              |
|----|--------------|--------------|--------------|
| 27 | -0.000413000 | -0.000369000 | 0.260019000  |
| 8  | 0.931143000  | 1.702202000  | -0.586554000 |
| 8  | 0.766176000  | -1.142844000 | 1.937870000  |
| 8  | -0.930869000 | -1.702120000 | -0.587364000 |
| 8  | -0.764677000 | 1.143223000  | 1.937917000  |
| 7  | 1.828238000  | -0.750527000 | -0.559470000 |
| 7  | -1.828468000 | 0.750748000  | -0.559282000 |
| 6  | 2.116258000  | 1.553607000  | -1.049788000 |
| 6  | 2.682507000  | 0.160236000  | -1.050729000 |
| 6  | 4.044392000  | -0.063245000 | -1.480168000 |
| 1  | 4.454249000  | -1.075308000 | -1.414758000 |
| 6  | 4.816883000  | 0.992467000  | -1.930733000 |
| 6  | 4.226169000  | 2.330465000  | -1.969954000 |
| 1  | 4.866668000  | 3.137108000  | -2.341508000 |
| 6  | 2.943135000  | 2.655993000  | -1.555840000 |
| 6  | 6.291895000  | 0.828185000  | -2.387754000 |
| 6  | 6.783232000  | -0.647028000 | -2.286354000 |
| 1  | 6.747827000  | -1.025013000 | -1.244467000 |
| 1  | 7.836160000  | -0.709292000 | -2.625081000 |
| 1  | 6.188155000  | -1.327663000 | -2.928471000 |
| 6  | 6.422165000  | 1.288128000  | -3.882118000 |
| 1  | 6.137888000  | 2.349310000  | -4.022905000 |
| 1  | 5.782539000  | 0.671417000  | -4.545307000 |
| 1  | 7.472981000  | 1.177292000  | -4.218191000 |
| 6  | 7.216760000  | 1.716942000  | -1.484485000 |
| 1  | 6.958236000  | 2.792221000  | -1.545432000 |
| 1  | 8.272037000  | 1.609086000  | -1.807379000 |
| 1  | 7.149324000  | 1.408137000  | -0.421776000 |
| 6  | 2.393813000  | 4.112008000  | -1.599641000 |
| 6  | 2.008778000  | 4.579211000  | -0.152984000 |
| 1  | 1.217877000  | 3.944402000  | 0.283624000  |
| 1  | 1.639862000  | 5.624967000  | -0.185075000 |
| 1  | 2.893118000  | 4.552820000  | 0.516348000  |
| 6  | 3.449465000  | 5.116785000  | -2.156129000 |
| 1  | 3.008791000  | 6.133246000  | -2.167443000 |
| 1  | 3.749946000  | 4.876957000  | -3.196507000 |
| 1  | 4.360725000  | 5.160010000  | -1.525346000 |
| 6  | 1.139895000  | 4.167618000  | -2.537677000 |
| 1  | 0.334354000  | 3.503953000  | -2.178560000 |
| 1  | 1.410388000  | 3.869461000  | -3.571539000 |
| 1  | 0.745316000  | 5.203647000  | -2.575440000 |
| 6  | 2.132128000  | -2.134083000 | -0.504089000 |
| 6  | 2.537981000  | -2.843263000 | -1.664553000 |
| 1  | 2.632486000  | -2.298077000 | -2.612776000 |
| 6  | 2.763987000  | -4.230176000 | -1.621727000 |
| 1  | 3.057592000  | -4.759127000 | -2.539335000 |
| 6  | 2.594338000  | -4.943106000 | -0.415592000 |

|   |              |              |              |
|---|--------------|--------------|--------------|
| 1 | 2.754594000  | -6.028935000 | -0.383097000 |
| 6 | 2.206065000  | -4.253906000 | 0.745544000  |
| 1 | 2.055346000  | -4.811225000 | 1.678331000  |
| 6 | 1.969303000  | -2.851581000 | 0.731269000  |
| 6 | 1.512913000  | -2.154459000 | 1.979368000  |
| 6 | 1.929684000  | -2.655415000 | 3.334775000  |
| 6 | 3.198562000  | -3.252078000 | 3.564876000  |
| 1 | 3.903756000  | -3.386326000 | 2.734383000  |
| 6 | 3.574332000  | -3.636084000 | 4.866723000  |
| 1 | 4.564395000  | -4.079279000 | 5.040921000  |
| 6 | 2.682524000  | -3.450188000 | 5.943884000  |
| 1 | 2.973086000  | -3.763174000 | 6.956507000  |
| 6 | 1.418893000  | -2.856682000 | 5.723577000  |
| 1 | 0.725191000  | -2.713169000 | 6.563465000  |
| 6 | 1.049889000  | -2.445555000 | 4.431645000  |
| 1 | 0.078582000  | -1.967389000 | 4.250037000  |
| 6 | -2.116584000 | -1.553431000 | -1.049962000 |
| 6 | -2.682762000 | -0.160336000 | -1.050679000 |
| 6 | -2.132420000 | 2.134109000  | -0.503614000 |
| 6 | -2.539351000 | 2.843467000  | -1.663670000 |
| 1 | -2.634565000 | 2.298377000  | -2.611875000 |
| 6 | -2.765557000 | 4.230308000  | -1.620535000 |
| 1 | -3.059986000 | 4.759282000  | -2.537872000 |
| 6 | -2.595088000 | 4.943210000  | -0.414469000 |
| 1 | -2.755505000 | 6.029008000  | -0.381766000 |
| 6 | -2.205834000 | 4.253954000  | 0.746279000  |
| 1 | -2.054521000 | 4.811202000  | 1.679017000  |
| 6 | -1.968849000 | 2.851644000  | 0.731714000  |
| 6 | -1.511730000 | 2.154644000  | 1.979548000  |
| 6 | -1.928127000 | 2.655488000  | 3.335143000  |
| 6 | -1.047815000 | 2.445961000  | 4.431664000  |
| 1 | -0.076411000 | 1.968141000  | 4.249660000  |
| 6 | -1.416434000 | 2.856960000  | 5.723745000  |
| 1 | -0.722335000 | 2.713707000  | 6.563350000  |
| 6 | -2.680197000 | 3.449999000  | 5.944572000  |
| 1 | -2.970461000 | 3.762876000  | 6.957315000  |
| 6 | -3.572507000 | 3.635556000  | 4.867774000  |
| 1 | -4.562668000 | 4.078377000  | 5.042367000  |
| 6 | -3.197126000 | 3.251676000  | 3.565772000  |
| 1 | -3.902706000 | 3.385654000  | 2.735564000  |
| 6 | -4.044685000 | 0.063106000  | -1.479685000 |
| 1 | -4.454518000 | 1.075170000  | -1.414205000 |
| 6 | -4.817492000 | -0.992635000 | -1.929923000 |
| 6 | -4.226933000 | -2.330506000 | -1.969014000 |
| 1 | -4.867511000 | -3.137298000 | -2.340096000 |
| 6 | -2.943626000 | -2.655829000 | -1.555201000 |
| 6 | -6.292661000 | -0.828188000 | -2.386481000 |
| 6 | -6.783904000 | 0.647026000  | -2.284649000 |
| 1 | -6.748258000 | 1.024771000  | -1.242683000 |
| 1 | -7.836900000 | 0.709436000  | -2.623152000 |
| 1 | -6.188909000 | 1.327780000  | -2.926719000 |
| 6 | -6.423418000 | -1.287815000 | -3.880893000 |

|   |              |              |              |
|---|--------------|--------------|--------------|
| 1 | -6.139252000 | -2.348992000 | -4.021938000 |
| 1 | -5.783897000 | -0.671047000 | -4.544134000 |
| 1 | -7.474312000 | -1.176822000 | -4.216688000 |
| 6 | -7.217341000 | -1.717058000 | -1.483147000 |
| 1 | -6.958824000 | -2.792324000 | -1.544347000 |
| 1 | -8.272706000 | -1.609134000 | -1.805743000 |
| 1 | -7.149613000 | -1.408443000 | -0.420400000 |
| 6 | -2.394396000 | -4.111922000 | -1.598768000 |
| 6 | -2.008615000 | -4.578608000 | -0.152149000 |
| 1 | -1.217565000 | -3.943551000 | 0.283834000  |
| 1 | -1.639663000 | -5.624364000 | -0.184005000 |
| 1 | -2.892637000 | -4.551995000 | 0.517595000  |
| 6 | -3.450344000 | -5.116936000 | -2.154285000 |
| 1 | -3.009669000 | -6.133404000 | -2.165407000 |
| 1 | -3.751380000 | -4.877543000 | -3.194601000 |
| 1 | -4.361274000 | -5.159892000 | -1.523012000 |
| 6 | -1.140994000 | -4.167967000 | -2.537456000 |
| 1 | -0.335320000 | -3.504073000 | -2.179056000 |
| 1 | -1.412069000 | -3.870260000 | -3.571297000 |
| 1 | -0.746387000 | -5.204002000 | -2.574995000 |

**2b** ISQ-<sub>IS</sub>Co<sup>III</sup>-ISQ<sup>+</sup>

|    |              |              |              |
|----|--------------|--------------|--------------|
| 27 | -0.001096000 | 0.225832000  | -0.022548000 |
| 8  | -1.102916000 | 1.379115000  | -1.174966000 |
| 8  | 0.831828000  | -1.294484000 | 1.160748000  |
| 8  | 1.078370000  | 1.571409000  | 0.919779000  |
| 8  | -0.815650000 | -1.471834000 | -0.946643000 |
| 7  | -1.498649000 | 0.349014000  | 1.198648000  |
| 7  | 1.501998000  | 0.161844000  | -1.243583000 |
| 6  | -2.347575000 | 1.450267000  | -0.735649000 |
| 6  | -2.621810000 | 0.876408000  | 0.584400000  |
| 6  | -3.956854000 | 0.845252000  | 1.098156000  |
| 1  | -4.144740000 | 0.341303000  | 2.051180000  |
| 6  | -5.000248000 | 1.412603000  | 0.366193000  |
| 6  | -4.687885000 | 2.038502000  | -0.899900000 |
| 1  | -5.517445000 | 2.497428000  | -1.448271000 |
| 6  | -3.415238000 | 2.078123000  | -1.482733000 |
| 6  | -1.352967000 | 0.183986000  | 2.584543000  |
| 6  | -2.024220000 | 1.054342000  | 3.496437000  |
| 1  | -2.639665000 | 1.866746000  | 3.093608000  |
| 6  | -1.867414000 | 0.925013000  | 4.882746000  |
| 1  | -2.382646000 | 1.629422000  | 5.550822000  |
| 6  | -1.030956000 | -0.079793000 | 5.419409000  |
| 1  | -0.893736000 | -0.172866000 | 6.504651000  |
| 6  | -0.347478000 | -0.938444000 | 4.546337000  |
| 1  | 0.338913000  | -1.687607000 | 4.958709000  |
| 6  | -0.474917000 | -0.829128000 | 3.131927000  |
| 6  | 0.389893000  | -1.690778000 | 2.275973000  |
| 6  | 0.812524000  | -3.058878000 | 2.730685000  |
| 6  | -0.050486000 | -3.898496000 | 3.485131000  |
| 1  | -1.046411000 | -3.542345000 | 3.779504000  |
| 6  | 0.352872000  | -5.204156000 | 3.824941000  |

|   |              |              |              |
|---|--------------|--------------|--------------|
| 1 | -0.326023000 | -5.854493000 | 4.393331000  |
| 6 | 1.624712000  | -5.675028000 | 3.436392000  |
| 1 | 1.942882000  | -6.689248000 | 3.715348000  |
| 6 | 2.488610000  | -4.845850000 | 2.685907000  |
| 1 | 3.479777000  | -5.213267000 | 2.386282000  |
| 6 | 2.080586000  | -3.552119000 | 2.319618000  |
| 1 | 2.738721000  | -2.904447000 | 1.726019000  |
| 6 | 2.326146000  | 1.579671000  | 0.483298000  |
| 6 | 2.617486000  | 0.789513000  | -0.715638000 |
| 6 | 1.369208000  | -0.231010000 | -2.583599000 |
| 6 | 2.049681000  | 0.477323000  | -3.620782000 |
| 1 | 2.663301000  | 1.344706000  | -3.352261000 |
| 6 | 1.901331000  | 0.123911000  | -4.968384000 |
| 1 | 2.421910000  | 0.709834000  | -5.738883000 |
| 6 | 1.065837000  | -0.953840000 | -5.339734000 |
| 1 | 0.934655000  | -1.221822000 | -6.396232000 |
| 6 | 0.376897000  | -1.659542000 | -4.342787000 |
| 1 | -0.305819000 | -2.467478000 | -4.631793000 |
| 6 | 0.495646000  | -1.321584000 | -2.964208000 |
| 6 | -0.369237000 | -2.038006000 | -1.983886000 |
| 6 | -0.784837000 | -3.463259000 | -2.215617000 |
| 6 | -2.056338000 | -3.888876000 | -1.744326000 |
| 1 | -2.723210000 | -3.156476000 | -1.271203000 |
| 6 | -2.456955000 | -5.226725000 | -1.900880000 |
| 1 | -3.450812000 | -5.544835000 | -1.557062000 |
| 6 | -1.581933000 | -6.162659000 | -2.496926000 |
| 1 | -1.893938000 | -7.210139000 | -2.611487000 |
| 6 | -0.306732000 | -5.755197000 | -2.942194000 |
| 1 | 0.380443000  | -6.486078000 | -3.390034000 |
| 6 | 0.089132000  | -4.409859000 | -2.814543000 |
| 1 | 1.086952000  | -4.101058000 | -3.152701000 |
| 6 | 3.958983000  | 0.673503000  | -1.199860000 |
| 1 | 4.159540000  | 0.013373000  | -2.049481000 |
| 6 | 4.992489000  | 1.359164000  | -0.561085000 |
| 6 | 4.661405000  | 2.199607000  | 0.568630000  |
| 1 | 5.483252000  | 2.751600000  | 1.036779000  |
| 6 | 3.380596000  | 2.339670000  | 1.117175000  |
| 6 | -3.146080000 | 2.747547000  | -2.864223000 |
| 6 | -2.082894000 | 3.888595000  | -2.700536000 |
| 1 | -2.448232000 | 4.668190000  | -2.001122000 |
| 1 | -1.121697000 | 3.499108000  | -2.320350000 |
| 1 | -1.900676000 | 4.372397000  | -3.682080000 |
| 6 | -2.624803000 | 1.673152000  | -3.880108000 |
| 1 | -1.679635000 | 1.215915000  | -3.536880000 |
| 1 | -3.376438000 | 0.869529000  | -4.023416000 |
| 1 | -2.444085000 | 2.148133000  | -4.866258000 |
| 6 | -4.438054000 | 3.383727000  | -3.464128000 |
| 1 | -4.853121000 | 4.180496000  | -2.813770000 |
| 1 | -4.192033000 | 3.849670000  | -4.438786000 |
| 1 | -5.230572000 | 2.630479000  | -3.650872000 |
| 6 | 3.088878000  | 3.254886000  | 2.344545000  |
| 6 | 4.367861000  | 4.006174000  | 2.827292000  |



|   |              |              |              |
|---|--------------|--------------|--------------|
| 1 | 5.159628000  | 3.310766000  | 3.173531000  |
| 1 | 4.792132000  | 4.659217000  | 2.037552000  |
| 1 | 4.102755000  | 4.655756000  | 3.684748000  |
| 6 | 2.019080000  | 4.333389000  | 1.954189000  |
| 1 | 2.385542000  | 4.968761000  | 1.121949000  |
| 1 | 1.065232000  | 3.868523000  | 1.646699000  |
| 1 | 1.821420000  | 4.994487000  | 2.822857000  |
| 6 | 2.560685000  | 2.388901000  | 3.539913000  |
| 1 | 3.310917000  | 1.626617000  | 3.835189000  |
| 1 | 2.374536000  | 3.039737000  | 4.418868000  |
| 1 | 1.617186000  | 1.875525000  | 3.282528000  |
| 6 | 6.478928000  | 1.249822000  | -1.005514000 |
| 6 | 7.008030000  | 2.671312000  | -1.403373000 |
| 1 | 6.950363000  | 3.391094000  | -0.563478000 |
| 1 | 8.070616000  | 2.605238000  | -1.713766000 |
| 1 | 6.428149000  | 3.089192000  | -2.251086000 |
| 6 | 6.662675000  | 0.301675000  | -2.228805000 |
| 1 | 7.734474000  | 0.260273000  | -2.506295000 |
| 1 | 6.339187000  | -0.735008000 | -2.003500000 |
| 1 | 6.104672000  | 0.658925000  | -3.118243000 |
| 6 | 7.335314000  | 0.688576000  | 0.182333000  |
| 1 | 7.297073000  | 1.345923000  | 1.073018000  |
| 1 | 6.982766000  | -0.318301000 | 0.485002000  |
| 1 | 8.397410000  | 0.603070000  | -0.124953000 |
| 6 | -6.478292000 | 1.392258000  | 0.850320000  |
| 6 | -6.987289000 | 2.866203000  | 1.016564000  |
| 1 | -6.947656000 | 3.431707000  | 0.065252000  |
| 1 | -8.041090000 | 2.865071000  | 1.362029000  |
| 1 | -6.380523000 | 3.414643000  | 1.765203000  |
| 6 | -6.643131000 | 0.661749000  | 2.217406000  |
| 1 | -7.710097000 | 0.673482000  | 2.515489000  |
| 1 | -6.326209000 | -0.399557000 | 2.161354000  |
| 1 | -6.069260000 | 1.158293000  | 3.026206000  |
| 6 | -7.364079000 | 0.650439000  | -0.209565000 |
| 1 | -7.334646000 | 1.144907000  | -1.200171000 |
| 1 | -7.030426000 | -0.398854000 | -0.341365000 |
| 1 | -8.421201000 | 0.635006000  | 0.125219000  |
