# Supplementary figures and images for: Cobalt complexes with hemilabileo-iminobenzoquinonate ligands: a novel example of redox-induced electron transfer
Source: Royal Society of Chemistry journal article supplement (doi:10.1039/c8dt02733a), 2018-01-01

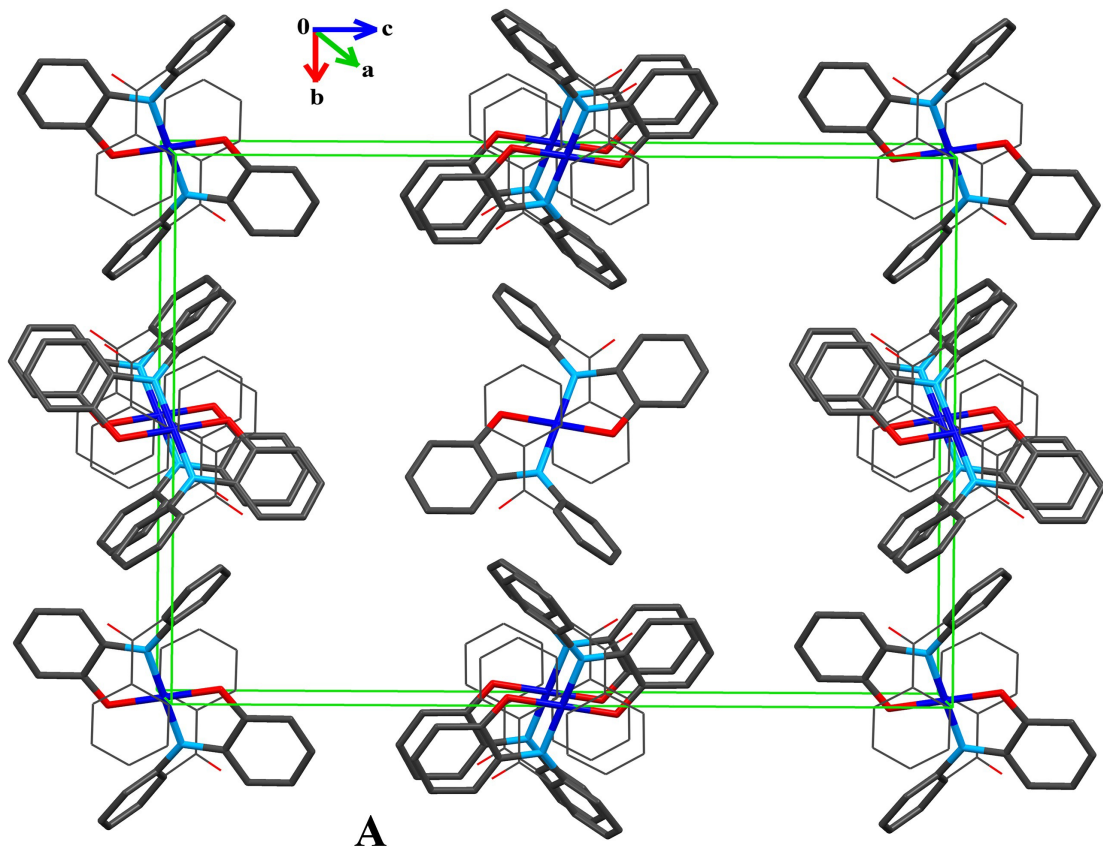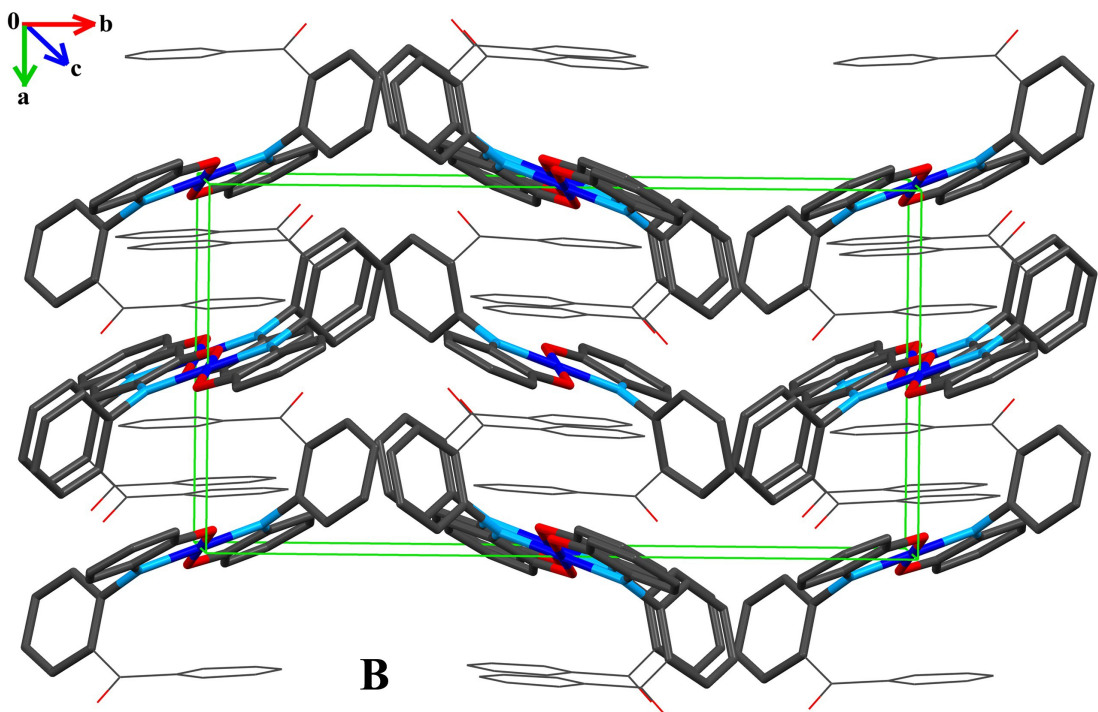

Supplement: c8dt02733a2.pdf [file c8dt02733a2.pdf]

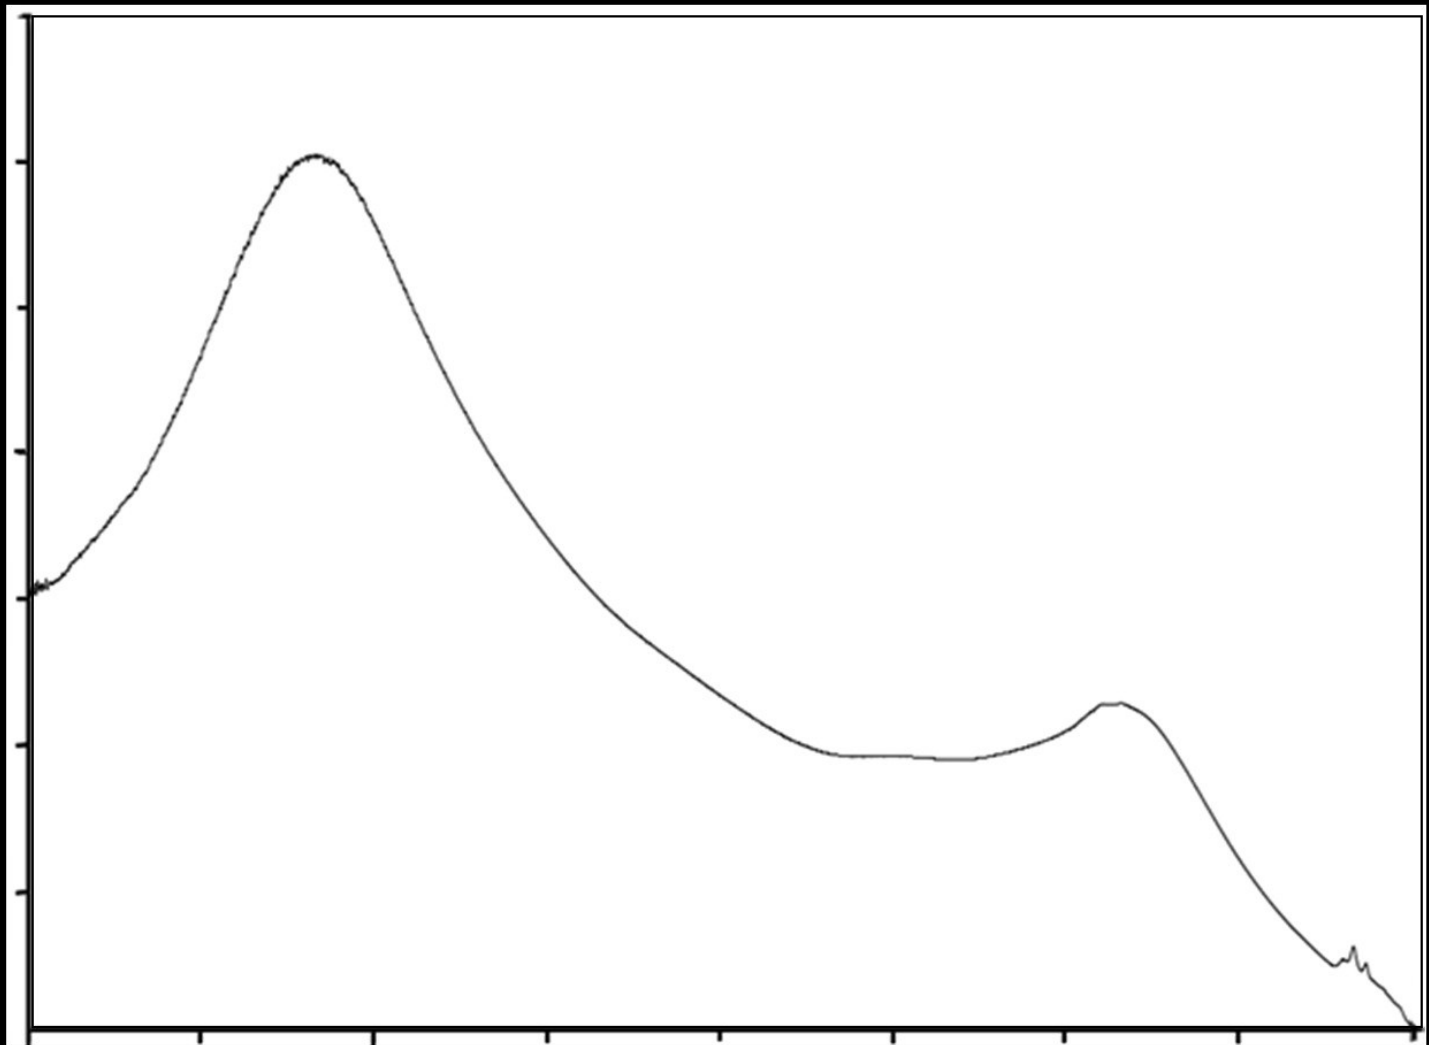

Supplement: c8dt02733a3.pdf [file c8dt02733a3.pdf]
